# Supplementary material for: The Mitochondrial Antioxidant SS-31 Modulates Oxidative Stress, Endoplasmic Reticulum Stress, and Autophagy in Type 2 Diabetes
Source: MDPI journal article supplement (doi:10.3390/jcm8091322), 2019-08-28
Supplement: s1 [file s1]

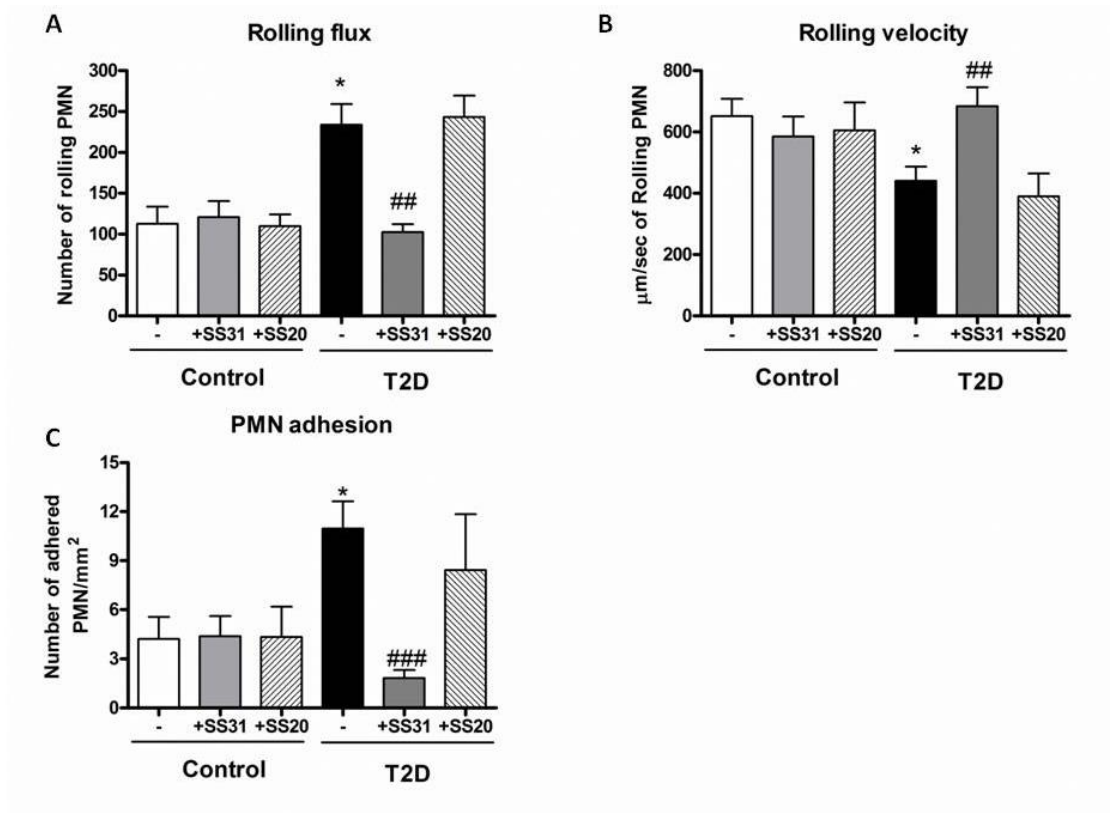

**Figure S1.** Leukocyte-endothelium interaction evaluation under SS-31 and SS-20 treatment. (A) Number of rolling PMN in 1 min, (B) velocity of this rolling PMN and (C) PMN adhesion to the endothelial monolayer. \*  $p < 0.05$  with regard to control group; ##  $p < 0.01$  ###  $p < 0.001$  vs. non-treated T2D group.
